# Supplementary material for: Women’s Views on Multifactorial Breast Cancer Risk Assessment and Risk-Stratified Screening: A Population-Based Survey from Four Provinces in Canada
Source: MDPI journal article supplement (doi:10.3390/jpm11020095), 2021-02-02
Supplement: s1 [file s1]

**Table S1.** Summary of associations between participants' characteristics (excluding don't know and prefer not to answer) and outcomes variables from mutually-adjusted logistic regression models by statistical significance.

| <b>OUTCOMES VARIABLES</b>                        | Using personal information* to assess BC risk? (A1) | Using genetic test results to assess BC risk? (A2) | Changing screening frequency depending of BC risk? (A3) | Providing personal information* to assess BC risk? (B1) | Providing sample of blood or saliva for genetic test to assess BC risk? (B2) | Having a mammogram to assess BC risk? (B3) | To have your BC risk level assessed? (C1) | To have your BC screening more often, if BC risk higher than average? (C2) | To have your BC screening less often, if BC average or lower than average? (C3) | Not to be offered any BC screening, if BC risk much lower than average? (C4) |
|--------------------------------------------------|-----------------------------------------------------|----------------------------------------------------|---------------------------------------------------------|---------------------------------------------------------|------------------------------------------------------------------------------|--------------------------------------------|-------------------------------------------|----------------------------------------------------------------------------|---------------------------------------------------------------------------------|------------------------------------------------------------------------------|
| <b>Positive response (%)</b>                     | <b>72.7</b>                                         | <b>72.9</b>                                        | <b>63.5</b>                                             | <b>61.5</b>                                             | <b>64.1</b>                                                                  | <b>66.7</b>                                | <b>74.8</b>                               | <b>85.7</b>                                                                | <b>49.2</b>                                                                     | <b>64.4</b>                                                                  |
| Age groups                                       | -                                                   | -                                                  | -                                                       | +                                                       | +                                                                            | +                                          | +                                         | +                                                                          | -                                                                               | +                                                                            |
| Province                                         | -                                                   | -                                                  | -                                                       | -                                                       | ++                                                                           | -                                          | -                                         | -                                                                          | -                                                                               | -                                                                            |
| Country of birth                                 | -                                                   | -                                                  | -                                                       | -                                                       | -                                                                            | -                                          | -                                         | -                                                                          | -                                                                               | -                                                                            |
| Ethnicity                                        | -                                                   | -                                                  | -                                                       | +                                                       | -                                                                            | -                                          | -                                         | -                                                                          | -                                                                               | -                                                                            |
| Education level                                  | +                                                   | -                                                  | -                                                       | +                                                       | -                                                                            | -                                          | -                                         | +                                                                          | -                                                                               | -                                                                            |
| Marital status                                   | -                                                   | -                                                  | +                                                       | +                                                       | +                                                                            | -                                          | -                                         | -                                                                          | -                                                                               | -                                                                            |
| Employment status                                | -                                                   | -                                                  | +                                                       | -                                                       | -                                                                            | -                                          | -                                         | -                                                                          | -                                                                               | -                                                                            |
| Total family income                              | +                                                   | +                                                  | -                                                       | +                                                       | +                                                                            | ++                                         | -                                         | ++                                                                         | +                                                                               | -                                                                            |
| Perceived health status                          | -                                                   | -                                                  | -                                                       | -                                                       | -                                                                            | +                                          | -                                         | -                                                                          | -                                                                               | -                                                                            |
| Ever had breast cancer                           | +                                                   | +                                                  | -                                                       | +                                                       | +                                                                            | -                                          | -                                         | -                                                                          | -                                                                               | -                                                                            |
| Perceived lifetime risk of breast cancer         | ++                                                  | ++                                                 | +                                                       | +                                                       | ++                                                                           | +                                          | ++                                        | ++                                                                         | ++                                                                              | ++                                                                           |
| Ever had a mammogram                             | +                                                   | +                                                  | -                                                       | +                                                       | +                                                                            | ++                                         | ++                                        | ++                                                                         | -                                                                               | ++                                                                           |
| Ever had a genetic test for breast cancer        | -                                                   | -                                                  | -                                                       | -                                                       | -                                                                            | +                                          | -                                         | -                                                                          | -                                                                               | +                                                                            |
| Family history of genetic test for breast cancer | -                                                   | +                                                  | +                                                       | +                                                       | +                                                                            | +                                          | +                                         | -                                                                          | +                                                                               | -                                                                            |

\* Personal information like age, cancers in your family, having children, lifestyle factors, breast density and weight.

- = p-value > 0.05; + = p-value between 0.05 and 0.0001; ++ = p-value < 0.0001.
